# Supplementary material for: Using human-in-the-loop optimization for guiding manual prosthesis adjustments: a proof-of-concept study
Source: Front Robot AI. 2023 Jul 19;10:1183170. doi: 10.3389/frobt.2023.1183170 (PMC10394618; doi:10.3389/frobt.2023.1183170)
Supplement: Supplementary file 2 [file Table1.xlsx]

## Sheet: HIL
Actual tested combinations
	Heel Height									Pylon Height									Loading Rate
	Participants									Participants									Participants
Trial	P1	P2	P3	P4	P5	P6	P7	P8		P1	P2	P3	P4	P5	P6	P7	P8		P1	P2	P3	P4	P5	P6	P7	P8
1	1	1	1	4	3	3	2	1		1	4	1	2	1	1	1	4		10671.9	14982.4	14361.2	8987.36	9602.23	13539.3	13709.6	16055.7
2	4	3	3	4	4	4	4	4		1	4	1	1	1	1	1	4		9874.84	12028.8	12840.8	9244.57	7783.85	11587.5	14937	13375.3
3	1	3	3	2	3	3	2	4		2	3	3	1	2	3	2	3		12019.8	11762.4	12219.1	8340.62	9996.8	14270.4	13996.2	13407.2
4	1	1	1	1	1	1	1	1		1	1	1	1	1	1	1	1		10569.8	13437.6	12647.3	16654.2	14260.5	15700.9	15325.7	12229
5	4	4	4	1	4	4	3	4		1	1	4	4	1	1	2	4		7252.02	9663.41	12315.4	12997.2	8867.97	11606.8	14821.4	12693.4
6	3	1	1	3	2	2	3	1		1	3	4	1	4	4	1	4		10024.4	14888.5	13179.7	12106.8	11783.9	15502.7	15267.7	13176.9
7	4	4	4	3	4	4	2	2		1	1	2	4	1	1	4	3		8411.69	9327.28	13337	13628	9404.94	11374	15539.6	12196
8	2	3	4	2	4	2	1	4		2	1	3	2	4	2	4	1		9670.5	10833.9	12430.8	13521.8	12527.9	13335.1	15442.8	10949.3
9	4	4	3	4	4	1	2	3		1	1	4	2	1	1	2	1		9074.09	9239.7	12450.3	10330.2	8763.83	16365.2	13361.7	12473.1
10	2	2	3	4	3	4	4	3		4	2	2	1	1	2	4	4		10853.1	9568.78	12190.7	13197.4	9806.59	13419.3	15419	12749
11	4	4	3	3	2	1	2	4		1	1	4	3	2	3	2	1		9008.76	8067.15	11210.4	10295.3	10589.5	16631.2	13369.4	11912.5
12	2	4	4	4	4	4	1	3		3	3	1	2	1	4	2	1		9645.4	10015.4	12619.7	12515.9	9303.75	11853.5	12982.6	12783.4
13	4	4	3	1	1	4	2	2		1	1	4	3	4	1	2	2		8297.62	9043.29	13675.3	11554.3	18977.4	10734.2	12157.5	12444.6
14	4	4	2	3	3	4	1	4		2	2	3	2	1	4	2	1		8184.58	9703.14	12822.2	11053.3	8991.15	11209.6	14922.2	11199
15	4	4	3	4	4	4	1	2		1	1	4	2	3	1	3	4		8728.62	8888.95	14364.3	10702.5	11273.4	11823.3	11922.2	12902.8
16	4	2	2	1	3	1	2	4		2	3	4	2	1	1	2	1		10402.2	10300.1	14543.9	15311.4	10546.6	14563	12873.9	11605.9
Estimated optimal combinations
	Heel Height									Pylon Height									Loading Rate
	Participants									Participants									Participants
Trial	P1	P2	P3	P4	P5	P6	P7	P8		P1	P2	P3	P4	P5	P6	P7	P8		P1	P2	P3	P4	P5	P6	P7	P8
1	NaN	NaN	NaN	NaN	NaN	NaN	NaN	NaN		NaN	NaN	NaN	NaN	NaN	NaN	NaN	NaN		NaN	NaN	NaN	NaN	NaN	NaN	NaN	NaN
2	NaN	NaN	NaN	NaN	NaN	NaN	NaN	NaN		NaN	NaN	NaN	NaN	NaN	NaN	NaN	NaN		NaN	NaN	NaN	NaN	NaN	NaN	NaN	NaN
3	NaN	NaN	NaN	NaN	NaN	NaN	NaN	NaN		NaN	NaN	NaN	NaN	NaN	NaN	NaN	NaN		NaN	NaN	NaN	NaN	NaN	NaN	NaN	NaN
4	4	4	4	1	4	4	1	4		1	1	4	4	1	1	1	4		9874.84	9752.71	11148.1	7117	7783.85	11587.5	13096	13375.3
5	4	4	1	2.90909	4	4	2.57576	1		1	1	4	1	1	1	1	4		9874.84	10125.5	11714.7	6280.04	7783.85	11587.5	13453.5	12133.2
6	4	4	4	2.90909	4	4	2.51515	1		1	1	2.48485	4	1	1	1	4		7907.73	9663.41	11886.8	-4873.39	8325.91	11602	13512.4	10087.5
7	4	4	4	3.18182	4	4	2.33333	4		1	1	2.75758	4	4	1	4	1		8264.83	9663.41	12007.2	6536.13	8257.4	11606.8	13949.6	11745.5
8	4	4	2.72727	3.75758	4	1	2.33333	2.72727		1	1	4	2.27273	1	1	1.66667	1		8172.35	7641.14	12130.1	8895.28	6257.96	4963.48	14295.7	9530.86
9	4	4	2.81818	4	3.27273	4	2.18182	2.72727		1	1	4	1	1	1.87879	1.87879	1		8596.56	9411.31	11778.3	10316	8430.09	11369.8	14326.5	6927.39
10	4	4	2.87879	4	3.30303	4	2.06061	4		1	1	4	1	1	1.93939	2.12121	1		8714.92	9346.81	12254.5	9498.1	5830.41	9312.65	13986	11502
11	4	3.87879	2.75758	4	3.51515	4	2.27273	3.24242		1	1.21212	3.75758	2.18182	1	4	2.24242	1		8894.51	9579.03	12204.1	10424.7	8837.01	9545.42	14000.9	11185
12	4	4	2.72727	3.90909	3.51515	4	2.21212	3.15152		1	1.27273	4	2.30303	1	1	2.27273	1		6195.29	9199.68	7656.44	10271.6	8938.65	12626.7	13819.2	11699.7
13	4	4	2.84848	3.48485	3.48485	4	1	4		1.18182	1.33333	4	2.09091	1	4	2.30303	1		8773.79	9174.09	11513.5	10759.2	8956.21	11819.3	12903.5	11826.1
14	4	4	3	3.57576	3.36364	4	1	3.90909		1.24242	1.33333	4	2.33333	1	1	2.33333	1		8691.69	9148.32	12338.9	10537.9	8650.2	11157.9	13259.6	11829.5
15	4	4	3.09091	3.66667	3.39394	1	2.24242	4		2	1.12121	4	2.33333	1	1	2.33333	1		8468.2	9210.6	12347.5	10598.1	8692.29	2882.89	13473.8	11680.9
16	4	4	3.60606	3.66667	3.33333	1	1.0303	3.57576		2	1.06061	2.66667	2.33333	1	4	2.42424	1		8475.44	9166.16	12505.9	10600.9	8633.28	2733.23	13240.5	11712.2

## Sheet: Sweep
Actual tested combinations
	Heel Height									Pylon Height									Loading Rate
	Participants									Participants									Participants
Trial	P1	P2	P3	P4	P5	P6	P7	P8		P1	P2	P3	P4	P5	P6	P7	P8		P1	P2	P3	P4	P5	P6	P7	P8
1	4	2	4	1	2	1	1	2		4	2	4	1	2	1	1	2		9504.35	13343.4	10766	19521.1	13930.3	14313	17095.1	12542.7
2	2	1	4	4	4	3	1	1		2	1	4	4	4	3	1	1		8813.73	17258.8	10188.5	12850.1	11080.8	13912.4	11855.8	13741.4
3	4	4	3	3	2	3	4	4		4	4	3	3	2	3	4	4		8368.03	7913.41	12227.9	15267.3	10554.2	18203.2	13993.5	13629.9
4	3	1	2	1	1	2	3	3		3	1	2	1	1	2	3	3		9816.21	14684	12155.4	11686.8	15554.5	19318.4	15393.8	12714.1
5	1	2	2	1	3	2	1	2		1	2	2	1	3	2	1	2		10010.5	9336.93	13117.9	11719.4	8671.21	14771.8	15921.6	12843.9
6	4	1	4	1	3	4	3	4		4	1	4	1	3	4	3	4		9199.83	12357.7	12235.8	9398.03	10118.1	12192.1	16809.8	13380.8
7	2	2	3	2	2	4	2	2		2	2	3	2	2	4	2	2		8942.77	9199.79	13579.8	15349.9	10064	12982	16387.2	15150.7
8	3	4	1	2	1	2	4	2		3	4	1	2	1	2	4	2		8189.65	6571.73	13626.5	14515	14803.7	17718.7	17326.7	11774.2
9	4	4	3	4	4	4	4	4		4	4	3	4	4	4	4	4		10820.7	8749.05	13333.3	14537.4	8865.4	14500.1	14552.3	12270.9
10	3	1	1	3	4	1	3	1		3	1	1	3	4	1	3	1		10146.6	14395.7	13939.4	13310.4	9000.16	20286.3	17418.1	14592.5
11	3	2	1	3	3	4	2	1		3	2	1	3	3	4	2	1		8955.77	9932.17	13077	13938.3	11398.8	14180.7	16574.8	14875.7
12	1	3	3	2	2	2	4	1		1	3	3	2	2	2	4	1		12146.4	11104.6	14385.4	14445.1	9766.91	17957.8	17373.5	15004.7
13	2	3	1	3	1	3	2	4		2	3	1	3	1	3	2	4		9907.18	9424.8	13607.2	9525.83	14977.6	11655.9	13391.8	11827.1
14	2	4	4	2	1	3	1	3		2	4	4	2	1	3	1	3		11391.5	6936.75	12291	11472.8	14874.1	12433.9	14453.7	10714.4
15	1	3	2	4	3	1	2	3		1	3	2	4	3	1	2	3		10573	10029.1	13146.8	8886.05	10503.6	19581.4	11087.2	11728.7
16	1	3	2	4	4	1	3	3		1	3	2	4	4	1	3	3		11464.6	10044.1	12473.1	8578.62	11120.3	22360.2	16864.3	12815.1
Estimated optimal combinations
	Heel Height	Pylon Height	Loading Rate
P1	3	1	8366.66
P2	4	1	6989.46
P3	4	2.697	11339.2
P4	4	2.7273	9405.84
P5	3.4545	1	8489.41
P6	4	1	12304.5
P7	1	1	11902.2
P8	3.1818	1	11381.6
